# Supplementary material
Source: publisher figshare collection journal article supplement (https://wiley.figshare.com/articles/dataset/_/3530438)
Supplement: Supplementary file 1 [file 1]

*Ecological Archives* E090-010-A1

**Jessica J. Kuang and Peter Chesson. 2009. Coexistence of annual plants: Generalist seed predation weakens the storage effect. *Ecology* 90:170–182.**

## Appendix A. General notation

|               |                                                                                                                                                                               |
|---------------|-------------------------------------------------------------------------------------------------------------------------------------------------------------------------------|
| $*$           | The equilibrium value of the variable                                                                                                                                         |
| $a$           | The attack rate or instantaneous per capita predation rate. In appendix D this symbol is used also as sensitivity of competition to the environment following (Chesson 1994). |
| $b$           | Conversion rate between prey and predator                                                                                                                                     |
| $C$           | The magnitude of competition, or “competitive response”                                                                                                                       |
| $\mathcal{C}$ | Standardized competitive response                                                                                                                                             |
| $d$           | Competitive coefficient                                                                                                                                                       |
| $E$           | $= \ln(G)$ , the environmental response                                                                                                                                       |
| $\mathcal{E}$ | Standardized environmental response                                                                                                                                           |
| $G$           | Germination fraction                                                                                                                                                          |
| $F$           | $= C + aP$ , combined density-dependent limiting factor                                                                                                                       |
| $i$           | Index for invader                                                                                                                                                             |
| $\{-i\}$      | Used as a superscript to indicate a measurement with species $i$ as the invader                                                                                               |
| $j$           | Index for an arbitrary species $j$                                                                                                                                            |
| $n$           | Number of annual plant species                                                                                                                                                |
| $N$           | Density of an annual plant species                                                                                                                                            |
| $O(x)$        | Standard mathematical notation meaning any quantity that remains of comparable magnitude to a variable $x$ as $x$ becomes small                                               |
| $P$           | Predator density                                                                                                                                                              |
| $r$           | Population growth rate, when not a subscript. When a subscript, it is an index for a resident species.                                                                        |

|            |                                                                                                                                                                 |
|------------|-----------------------------------------------------------------------------------------------------------------------------------------------------------------|
| $s$        | Seed survival in the seed bank                                                                                                                                  |
| $s_p$      | Survival of the predator between years                                                                                                                          |
| $Y$        | Annual plant seed yield each season                                                                                                                             |
| $\beta$    | $= 1 - s(1 - \bar{G})$ , the mean fraction of seed lost from the seed bank over one year                                                                        |
| $\Delta E$ | Average fitness difference between a species and its competitors, or more generally, the mean difference in standardized environmental responses (Chesson 1994) |
| $\Delta I$ | The storage effect                                                                                                                                              |
| $\eta$     | $= \ln \left\{ \bar{G}Y / \left[ 1 - s(1 - \bar{G}) \right] \right\}$ , seed production per unit seed loss (log scale)                                          |
| $\lambda$  | Finite rate of increase, $N(t + 1)/N(t)$ .                                                                                                                      |
| $\rho$     | Correlation between the environmental responses of different species                                                                                            |
| $\sigma^2$ | the common variance, $\text{Var}(E)$ , of the environmental responses                                                                                           |

### **Literature Cited**

Chesson, P. 1994. Multispecies Competition in Variable Environments. *Theoretical Population Biology* **45**:227-276.
